# Supplementary figures and images for: Pressure induced semiconductor–metal phase transition in GaAs: experimental and theoretical approaches
Source: Royal Society of Chemistry journal article supplement (doi:10.1039/c5ra25013g), 2016-01-01

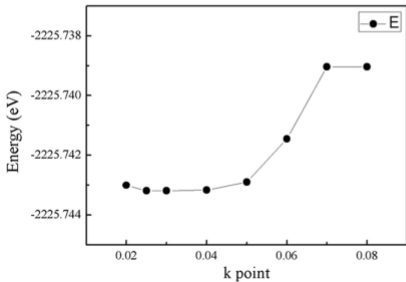

Supplement: c5ra25013g1.pdf [file c5ra25013g1.pdf]
